# Supplementary material for: High-Resolution Conformational Analysis of RGDechi-Derived Peptides Based on a Combination of NMR Spectroscopy and MD Simulations
Source: MDPI journal article supplement (doi:10.3390/ijms231911039), 2022-09-20

## Supplementary Materials

**Table S1.**  $^1\text{H}$  and  $^{15}\text{N}$  chemical shifts assignment\* of  $\psi\text{RGDechi}$  in HBSS buffer (pH 7.4) at 298K on 600 MHz spectrometer.

| <i>Residue</i>    | <i>H<sub>N</sub></i> | <i>N</i> | <i>H<math>\alpha</math></i> | <i>H<math>\beta</math></i> | <i>Others</i>                                                                            |
|-------------------|----------------------|----------|-----------------------------|----------------------------|------------------------------------------------------------------------------------------|
| Lys <sup>1</sup>  | 8.59                 | 126.2    | 4.13                        | 1.85, 1.76                 | $\gamma\text{CH}_2$ 1.51, 1.37<br>$\delta\text{CH}_2$ 1.71<br>$\epsilon\text{CH}_2$ 3.01 |
| Arg <sup>2</sup>  | 8.51                 | 117.6    | 4.41                        | 1.90, 1.85                 | $\gamma\text{CH}_2$ 1.61<br>$\delta\text{CH}_2$ 3.20<br>$\epsilon\text{CH}_2$ 7.53       |
| Gly <sup>3</sup>  | 8.52                 | 109.5    | 4.15, 3.78                  |                            |                                                                                          |
| Asp <sup>4</sup>  | 8.46                 | 119.6    | 4.62                        | 2.84, 2.73                 |                                                                                          |
| DGlu <sup>5</sup> | 8.14                 | 118.3    | 4.36                        | 2.17, 2.13                 | $\gamma\text{CH}_2$ 2.49                                                                 |
| Met <sup>6</sup>  | 8.09                 | 121.0    | 4.51                        | 2.06, 1.86                 | $\gamma\text{CH}_2$ 2.60, 2.50<br>$\epsilon\text{CH}_3$ 2.10                             |
| Asp <sup>7</sup>  | 8.37                 | 119.6    | 4.65                        | 2.80, 2.69                 |                                                                                          |
| Asp <sup>8</sup>  | 8.25                 | 120.7    | 4.92                        | 2.81, 2.62                 |                                                                                          |
| Pro <sup>9</sup>  |                      |          | 4.40                        | 2.23, 1.80                 | $\gamma\text{CH}_2$ 1.99, 1.81<br>$\delta\text{CH}_2$ 3.73                               |
| Gly <sup>10</sup> | 8.47                 | 108.3    | 3.95, 3.88                  |                            |                                                                                          |
| Arg <sup>11</sup> | 7.93                 | 120.0    | 4.32                        | 1.86, 1.73                 | $\gamma\text{CH}_2$ 1.63, 1.58<br>$\delta\text{CH}_2$ 3.19<br>$\epsilon\text{NH}$ 7.24   |
| Asn <sup>12</sup> | 8.42                 | 121.0    | 4.96                        | 2.86, 2.74                 | $\delta\text{NH}_2$ 7.70, 7.02                                                           |
| Pro <sup>13</sup> |                      |          | 4.41                        | 2.26, 1.99                 | $\gamma\text{CH}_2$ 2.03, 1.81<br>$\delta\text{CH}_2$ 3.79                               |

|                    |      |       |           |            |                                                                         |
|--------------------|------|-------|-----------|------------|-------------------------------------------------------------------------|
| His <sup>14</sup>  | 8.51 | 117.7 | 4.70      | 3.31, 3.20 | δ2H 6.97<br>ε1H 7.26                                                    |
| hCyt <sup>15</sup> | 8.09 | 122.5 | 4.37      | 1.86, 1.76 | γCH <sub>2</sub> 1.36<br>δCH <sub>2</sub> 1.50<br>εCH <sub>3</sub> 3.02 |
| Gly <sup>16</sup>  | 8.33 | 110.4 | 4.08,4.04 |            |                                                                         |
| Pro <sup>17</sup>  |      |       | 4.42      | 2.14, 1.80 | γCH <sub>2</sub> 2.07, 1.81<br>δCH <sub>2</sub> 3.79                    |
| Ala <sup>18</sup>  | 8.38 | 119.7 | 4.11      | 1.56       |                                                                         |
| Thr <sup>19</sup>  | 8.34 | 120.9 | 4.20      | 4.25       | γCH <sub>2</sub> 1.20                                                   |

\*<sup>1</sup>H, <sup>15</sup>N chemical shifts error values are ± 0.01 ppm and ± 0.4 ppm, respectively.

**Table S2.**  $^{13}\text{C}$  chemical shifts assignment\* of  $\psi\text{RGDechi}$  in HBSS buffer (pH 7.4) at 298K on 600 MHz spectrometer.

| <i>Residue</i>     | <i>C<math>\alpha</math></i> | <i>C<math>\beta</math></i> | <i>Others</i>                                           |
|--------------------|-----------------------------|----------------------------|---------------------------------------------------------|
| Lys <sup>1</sup>   | 58.4                        | 33.7                       | C $\gamma$ 25.1<br>C $\delta$ 29.1<br>C $\epsilon$ 42.1 |
| Arg <sup>2</sup>   | 56.1                        | 30.4                       | C $\gamma$ 27.2<br>C $\delta$ 43.3                      |
| Gly <sup>3</sup>   | 46.5                        |                            |                                                         |
| Asp <sup>4</sup>   | 53.8                        | 39.0                       |                                                         |
| DGlu <sup>5</sup>  | 56.9                        | 28.3                       | C $\gamma$ 33.5                                         |
| Met <sup>6</sup>   | 55.6                        | 32.7                       | C $\gamma$ 32.2<br>$\epsilon\text{CH}_3$ 17.1           |
| Asp <sup>7</sup>   | 53.8                        | 40.0                       |                                                         |
| Asp <sup>8</sup>   | 52.1                        | 40.5                       |                                                         |
| Pro <sup>9</sup>   | 63.6                        | 32.2                       | C $\gamma$ 27.1<br>C $\delta$ 50.7                      |
| Gly <sup>10</sup>  | 45.4                        |                            |                                                         |
| Arg <sup>11</sup>  | 56.0                        | 30.9                       | C $\gamma$ 27.2<br>C $\delta$ 43.4                      |
| Asn <sup>12</sup>  | 51.4                        | 39.2                       |                                                         |
| Pro <sup>13</sup>  | 63.6                        | 32.1                       | C $\gamma$ 27.3<br>C $\delta$ 49.7                      |
| His <sup>14</sup>  | 55.3                        | 28.6                       |                                                         |
| hCyt <sup>15</sup> | 56.6                        | 33.7                       | C $\gamma$ 22.6                                         |

|                   |      |      |                                                    |
|-------------------|------|------|----------------------------------------------------|
|                   |      |      | C $\delta$ 31.3<br>$\epsilon$ CH <sub>2</sub> 42.2 |
| Gly <sup>16</sup> | 44.7 |      |                                                    |
| Pro <sup>17</sup> | 63.9 | 31.2 | C $\gamma$ 27.1<br>C $\delta$ 50.8                 |
| Ala <sup>18</sup> | 51.3 | 18.1 |                                                    |
| Thr <sup>19</sup> | 63.6 | 70.4 | C $\gamma$ 22.2                                    |

\*<sup>13</sup>C chemical shifts error values is  $\pm$  0.3 ppm

**Table S3.** <sup>1</sup>H and <sup>15</sup>N chemical shifts assignment\* of RGDechi1-14 in HBSS buffer (pH 7.4) at 298K on 600 MHz spectrometer.

| <i>Residue</i>    | <i>H<sub>N</sub></i> | <i>N</i> | <i>H<math>\alpha</math></i> | <i>H<math>\beta</math></i> | <i>Others</i>                                                                                           |
|-------------------|----------------------|----------|-----------------------------|----------------------------|---------------------------------------------------------------------------------------------------------|
| Lys <sup>1</sup>  | 8.99                 | 125.6    | 4.16                        | 1.80                       | $\gamma$ CH <sub>2</sub> 1.51, 1.44<br>$\delta$ CH <sub>2</sub> 1.69<br>$\epsilon$ CH <sub>2</sub> 3.00 |
| Arg <sup>2</sup>  | 8.40                 | 119.4    | 4.37                        | 1.87, 1.68                 | $\gamma$ CH <sub>2</sub> 1.55<br>$\delta$ CH <sub>2</sub> 3.21<br>$\epsilon$ CH <sub>2</sub> 7.22       |
| Gly <sup>3</sup>  | 8.31                 | 112.0    | 4.15, 3.56                  |                            |                                                                                                         |
| Asp <sup>4</sup>  | 8.21                 | 124.2    | 4.78                        | 2.90, 2.65                 |                                                                                                         |
| DGlu <sup>5</sup> | 8.06                 | 121.9    | 4.46                        | 2.07, 1.90                 | $\gamma$ CH <sub>2</sub> 2.38                                                                           |
| Met <sup>6</sup>  | 8.22                 | 125.3    | 4.32                        | 2.06, 1.99                 | $\gamma$ CH <sub>2</sub> 2.61, 2.56<br>$\epsilon$ CH <sub>3</sub> 2.10                                  |
| Asp <sup>7</sup>  | 8.57                 | 119.7    | 4.63                        | 2.83                       |                                                                                                         |

|                   |      |       |            |            |                                                                                      |
|-------------------|------|-------|------------|------------|--------------------------------------------------------------------------------------|
| Asp <sup>8</sup>  | 8.20 | 120.3 | 4.95       | 2.86, 2.62 |                                                                                      |
| Pro <sup>9</sup>  |      |       | 4.43       | 2.30, 2.00 | $\gamma$ CH <sub>2</sub> 2.03<br>$\delta$ CH <sub>2</sub> 3.78                       |
| Gly <sup>10</sup> | 8.44 | 108.2 | 3.92, 3.85 |            |                                                                                      |
| Arg <sup>11</sup> | 7.92 | 119.9 | 4.31       | 1.86, 1.76 | $\gamma$ CH <sub>2</sub> 1.59<br>$\delta$ CH <sub>2</sub> 3.20<br>$\epsilon$ NH 7.24 |
| Asn <sup>12</sup> | 8.42 | 120.7 | 4.96       | 2.83, 2.67 | $\delta$ NH <sub>2</sub> 7.62, 6.94                                                  |
| Pro <sup>13</sup> |      |       | 4.40       | 2.23, 1.91 | $\gamma$ CH <sub>2</sub> 1.96, 1.84<br>$\delta$ CH <sub>2</sub> 3.75, 3.70           |
| His <sup>14</sup> | 8.11 | 122.4 | 4.50       | 3.26, 3.13 | $\delta$ 2H 7.30<br>$\epsilon$ 1H 8.59                                               |

\*<sup>1</sup>H, <sup>15</sup>N chemical shifts error values are  $\pm 0.01$  ppm and  $\pm 0.4$  ppm, respectively.

**Table S4.** <sup>13</sup>C chemical shifts assignment\* of RGDechi1-14 in HBSS buffer (pH 7.4) at 298K on 600 MHz spectrometer.

| <i>Residue</i>    | <i>C<math>\alpha</math></i> | <i>C<math>\beta</math></i> | <i>Others</i>                                           |
|-------------------|-----------------------------|----------------------------|---------------------------------------------------------|
| Lys <sup>1</sup>  | 58.4                        | 32.9                       | C $\gamma$ 25.2<br>C $\delta$ 29.0<br>C $\epsilon$ 42.2 |
| Arg <sup>2</sup>  | 55.4                        | 30.0                       | C $\gamma$ 27.3<br>C $\delta$ 43.4                      |
| Gly <sup>3</sup>  | 46.3                        |                            |                                                         |
| Asp <sup>4</sup>  | 52.4                        | 38.2                       |                                                         |
| DGlu <sup>5</sup> | 54.6                        | 29.7                       | C $\gamma$ 33.6                                         |

|                   |      |      |                                  |
|-------------------|------|------|----------------------------------|
| Met <sup>6</sup>  | 56.3 | 32.7 | Cδ 32.0<br>εCH <sub>3</sub> 16.9 |
| Asp <sup>7</sup>  | 53.5 | 39.2 |                                  |
| Asp <sup>8</sup>  | 51.6 | 39.9 |                                  |
| Pro <sup>9</sup>  | 64.0 | 32.1 | Cγ 27.2 Cδ 50.7                  |
| Gly <sup>10</sup> | 45.4 |      |                                  |
| Arg <sup>11</sup> | 56.0 | 30.9 | Cγ 27.1<br>Cδ 43.3               |
| Asn <sup>12</sup> | 51.5 | 38.9 |                                  |
| Pro <sup>13</sup> | 63.6 | 32.1 | Cγ 27.2<br>Cδ 50.7               |
| His <sup>14</sup> | 56.6 | 29.7 |                                  |

\*<sup>13</sup>C chemical shifts error values is ± 0.3 ppm

**Table S5.**  $^{13}\text{C}\beta$  and  $^{13}\text{C}\gamma$  chemical shifts, their difference  $\Delta\beta\gamma$  and predictions of *cis* Xaa-Pro likelihood for prolines of  $\psi$ RGDechi and RGDechi1-14.

| $\psi$ RGDechi    |                            |                             |                                         |                                                               |
|-------------------|----------------------------|-----------------------------|-----------------------------------------|---------------------------------------------------------------|
| <i>Residue</i>    | <i>C<math>\beta</math></i> | <i>C<math>\gamma</math></i> | <i><math>\Delta\beta\gamma^a</math></i> | <i>Normalized likelihood for Pro to be in cis<sup>b</sup></i> |
| Pro <sup>9</sup>  | 32.2                       | 27.1                        | 5.1                                     | 0.004                                                         |
| Pro <sup>13</sup> | 32.1                       | 27.3                        | 4.8                                     | 0.016                                                         |
| Pro <sup>17</sup> | 31.2                       | 27.1                        | 4.1                                     | 0.005                                                         |
| RGDechi1-14       |                            |                             |                                         |                                                               |
| Pro <sup>9</sup>  | 32.1                       | 27.2                        | 4.9                                     | 0.002                                                         |
| Pro <sup>13</sup> | 32.1                       | 27.2                        | 4.9                                     | 0.019                                                         |

<sup>a</sup> Values of  $\Delta\beta\gamma$  ( $\Delta\beta\gamma = \delta[\text{C}\beta] - \delta[\text{C}\gamma]$ ) for prolines are function of the Xaa-Pro peptide bond conformation:  $\Delta\beta\gamma$  Pro trans =  $4.51 \pm 1.17$  and  $\Delta\beta\gamma$  Pro cis =  $9.64 \pm 1.27$ .

<sup>b</sup>The predictions were performed by using the Promega server from the amino acid sequence and chemical shift data.

**Table S6.**  $^3\text{J}_{\text{NH}\alpha}$  coupling constants of  $\psi\text{RGDechi}$  in HBSS buffer (pH 7.4) at 298K on 600 MHz spectrometer.

| <i>Residue</i>     | <i><math>^3\text{J}_{\text{NH}\alpha}(\text{Hz})</math></i> |
|--------------------|-------------------------------------------------------------|
| Lys <sup>1</sup>   | 7.61                                                        |
| Arg <sup>2</sup>   | 7.39                                                        |
| Gly <sup>3</sup>   |                                                             |
| Asp <sup>4</sup>   | 5.64                                                        |
| DGlu <sup>5</sup>  | 7.32                                                        |
| Met <sup>6</sup>   |                                                             |
| Asp <sup>7</sup>   | 7.22                                                        |
| Asp <sup>8</sup>   | 6.21                                                        |
| Pro <sup>9</sup>   |                                                             |
| Gly <sup>10</sup>  |                                                             |
| Arg <sup>11</sup>  | 7.08                                                        |
| Asn <sup>12</sup>  | 8.14                                                        |
| Pro <sup>13</sup>  |                                                             |
| His <sup>14</sup>  | 7.58                                                        |
| hCyt <sup>15</sup> | 7.07                                                        |
| Gly <sup>16</sup>  |                                                             |
| Pro <sup>17</sup>  |                                                             |
| Ala <sup>18</sup>  | 6.84                                                        |
| Thr <sup>19</sup>  | 5.92                                                        |



**Table S7.**  $^3J_{NH\alpha}$  coupling constants of RGDechi1-14 in HBSS buffer (pH 7.4) at 298K on 600 MHz spectrometer.

| <i>Residue</i>    | <i><math>^3J_{NH\alpha}(\text{Hz})</math></i> |
|-------------------|-----------------------------------------------|
| Lys <sup>1</sup>  | 6.57                                          |
| Arg <sup>2</sup>  | 7.79                                          |
| Gly <sup>3</sup>  |                                               |
| Asp <sup>4</sup>  | 5.57                                          |
| DGlu <sup>5</sup> | 7.75                                          |
| Met <sup>6</sup>  | 5.48                                          |
| Asp <sup>7</sup>  | 7.70                                          |
| Asp <sup>8</sup>  | 6.87                                          |
| Pro <sup>9</sup>  |                                               |
| Gly <sup>10</sup> |                                               |
| Arg <sup>11</sup> | 6.74                                          |
| Asn <sup>12</sup> | 7.18                                          |
| Pro <sup>13</sup> |                                               |
| His <sup>14</sup> | 5.11                                          |

**Figure S1.** 2D [ $^1\text{H}$ - $^1\text{H}$ ] TOCSY and 2D [ $^1\text{H}$ - $^1\text{H}$ ] ROESY] spectra of RGDechi1-14 (A, B) and  $\psi$ RGDechi (C, D) peptides acquired at 298K using a 600 MHz spectrometer.

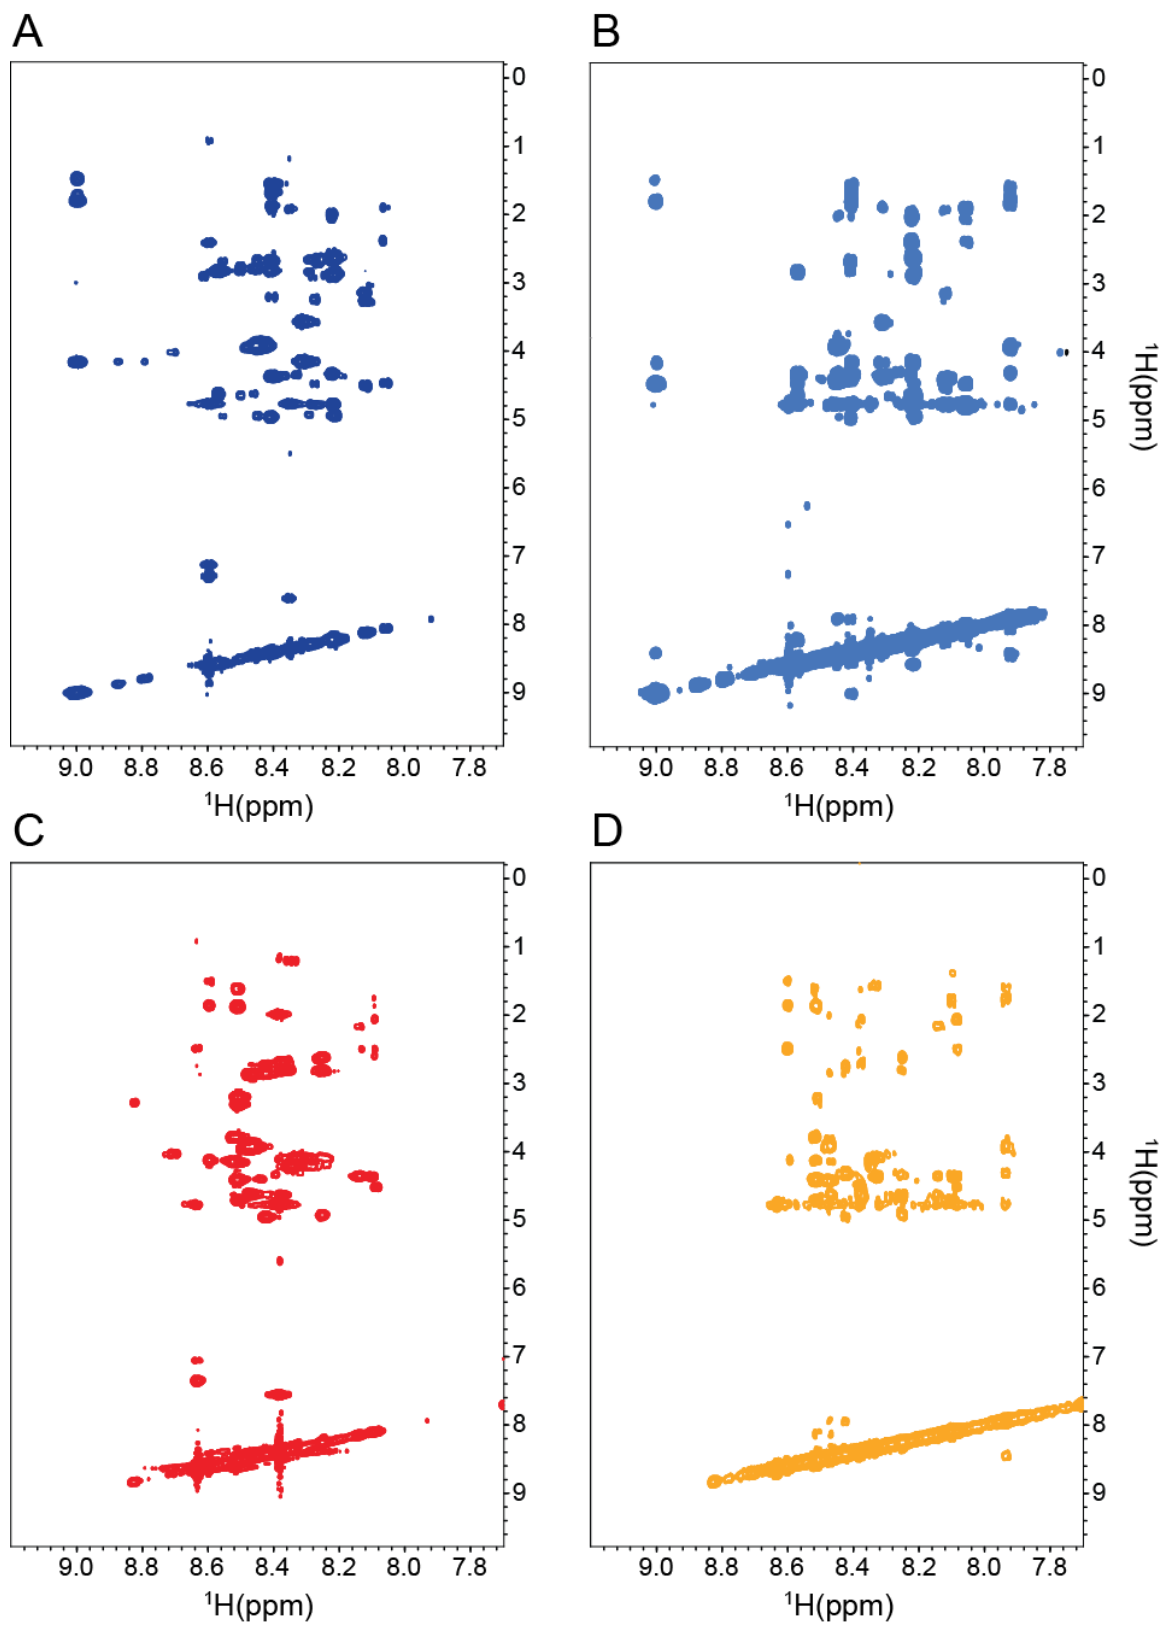

**Figure S2.** 2D [ $^1\text{H}$ - $^{15}\text{N}$ ] HSQC spectra of RGDechi1-14 (A) and  $\psi$ RGDechi (B) peptides acquired at 298K using a 600 MHz spectrometer.

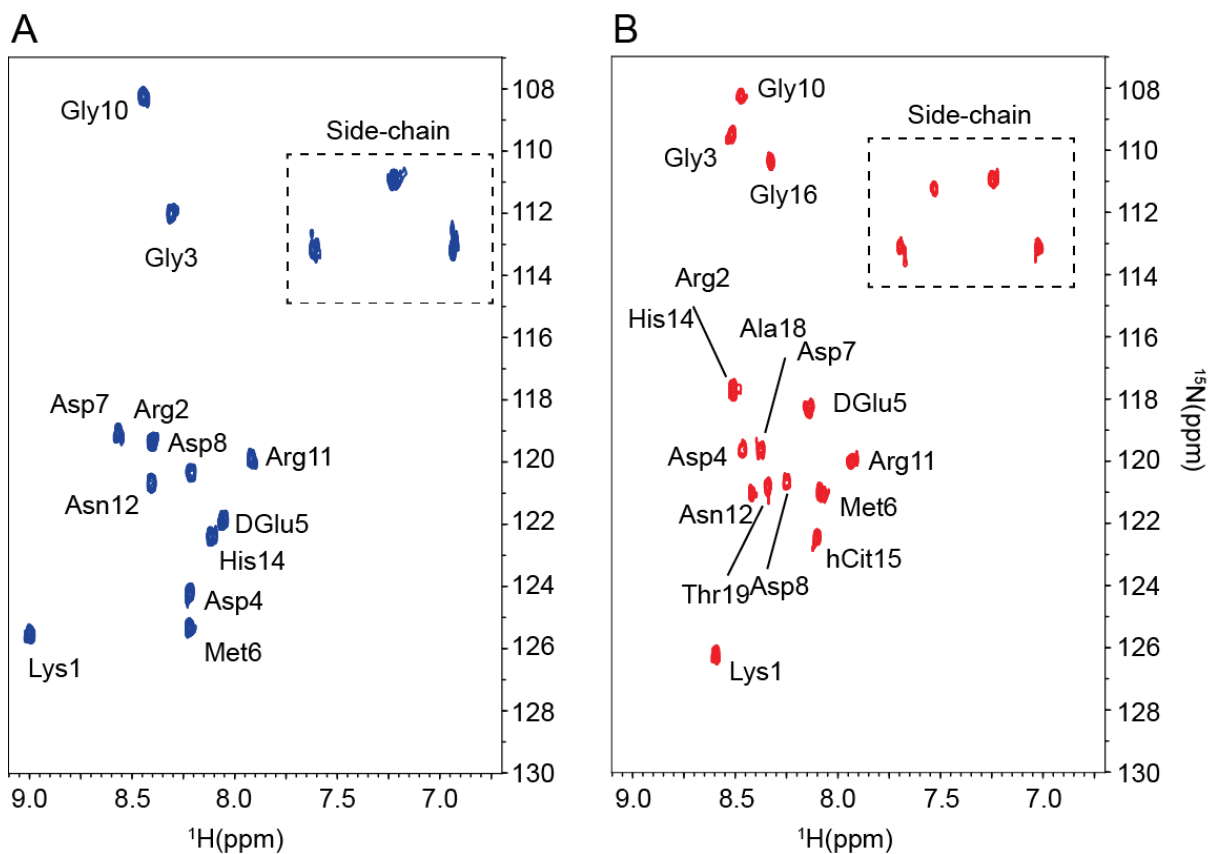

**Figure S3.** (A) Illustration of the expected NOE/ROE peaks depending on the *cis* and *trans* configuration of the peptidyl- prolyl peptide bond. Arrows indicate protons that are close through the space for each conformation. (Left) In the *cis* configuration of the Xaa-Pro peptide bond an NOE/ROE cross-peak(s) is expected between the  $\text{H}_\alpha$  of the proline and the  $\text{H}_\alpha$  of the previous residue. (Right) In the *trans* Xaa-Pro peptide bond configuration NOE/ROE cross-peak(s) are expected between the  $\text{H}_\alpha$  of the preceding residue and one or both

of the prolyl H $\delta$ 2 and H $\delta$ 3. (B) A portion of the 2D [ $^1\text{H}$ - $^1\text{H}$ ] ROESY spectra acquired for RGDechi1-14 (Left) and  $\psi$ RGDechi (Right) displaying H $\alpha$ -H $\delta$  ROEs from residue pairs D8-P9 and N12-P13 for both peptides and G16-P17 for only  $\psi$ RGDechi. (C) A portion of the 2D [ $^1\text{H}$ - $^{13}\text{C}$ ] HSQC spectra acquired on the RGDechi1-14 (Left) and  $\psi$ RGDechi (Right) at 298 K using a 600 MHz spectrometer. The black boxes indicate the C $\beta$  and C $\gamma$  chemical shifts regions for in *cis* and *trans* Xaa-Pro peptide bond conformations.

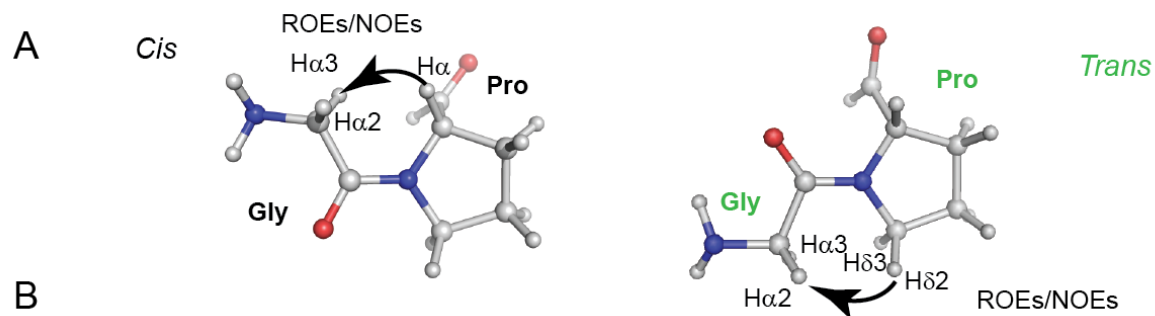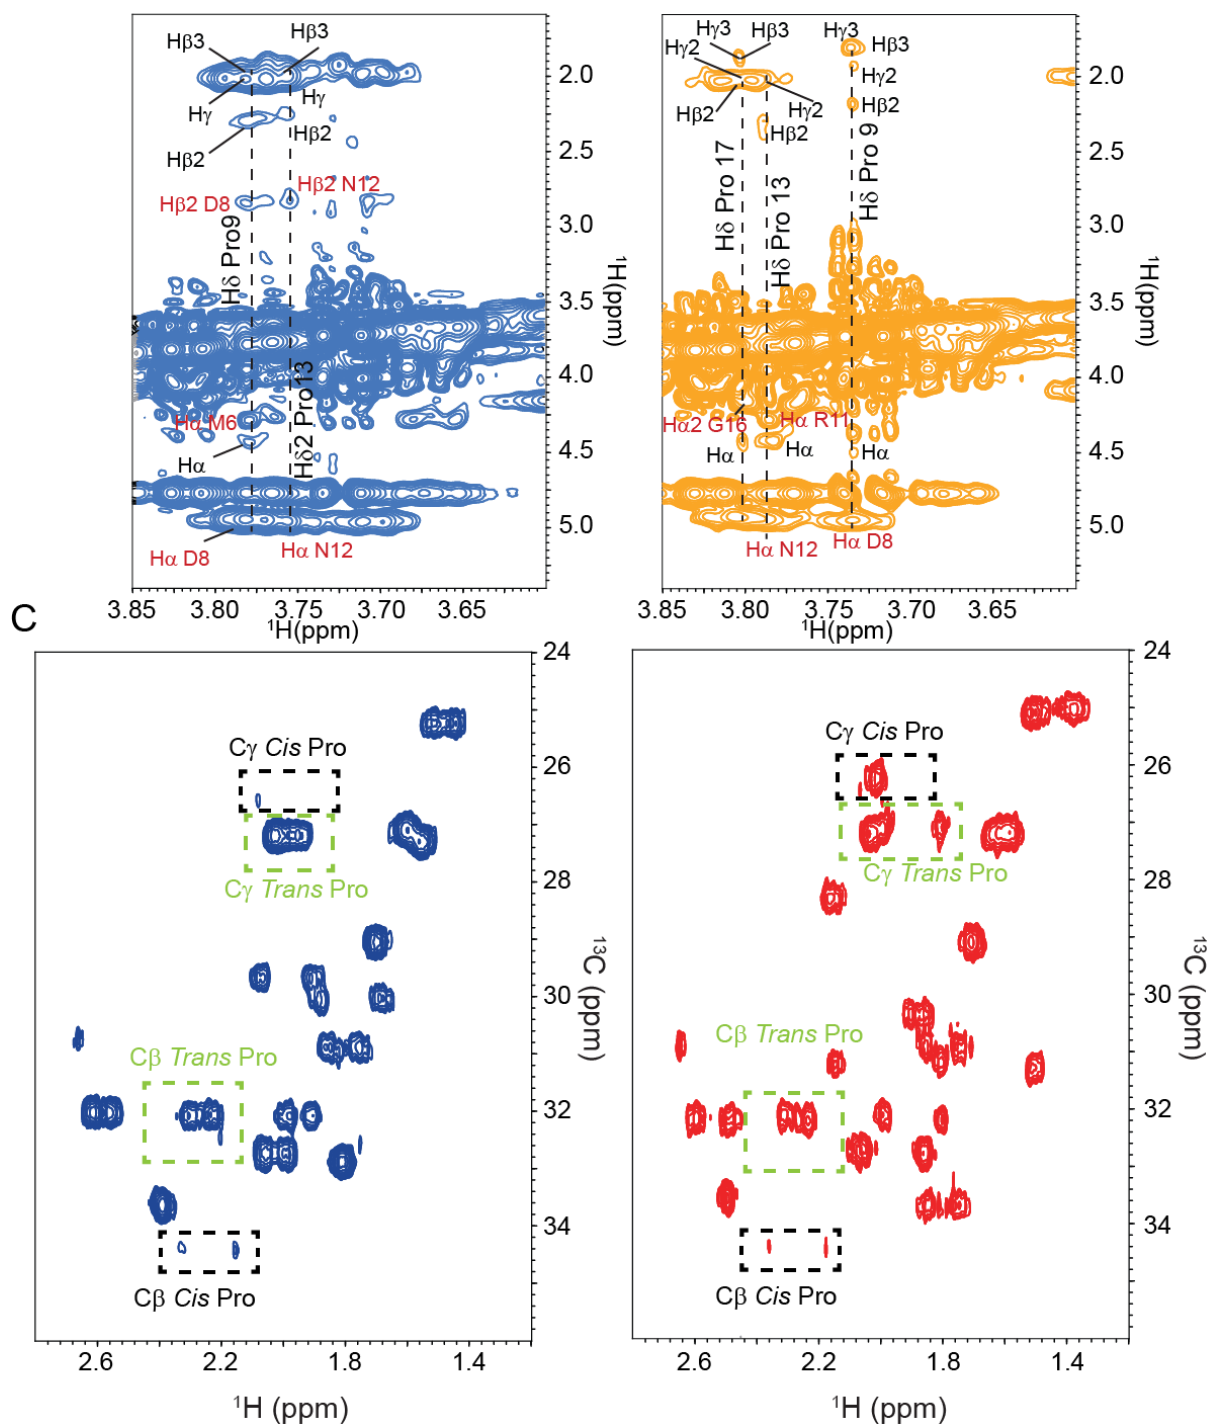

**Figure S4.** Flow-chart of the integrated approach applied to generate the conformational ensemble using a combination of NMR and MD for RGDechi1-14 (A) and  $\psi$ RGDechi (B) peptides. (C, D) Evaluation by using the experimental  $^1\text{H}$ ,  $^{15}\text{N}$  and  $^{13}\text{C}$  chemical shifts of each representative structure obtained for RGDechi1-14 and  $\psi$ RGDechi peptides by analysis of the MD conformational ensemble. The plots report the global CS-RMSD calculated, as reported in the materials and methods, for each model by evaluating the predicted versus observed chemical shifts.

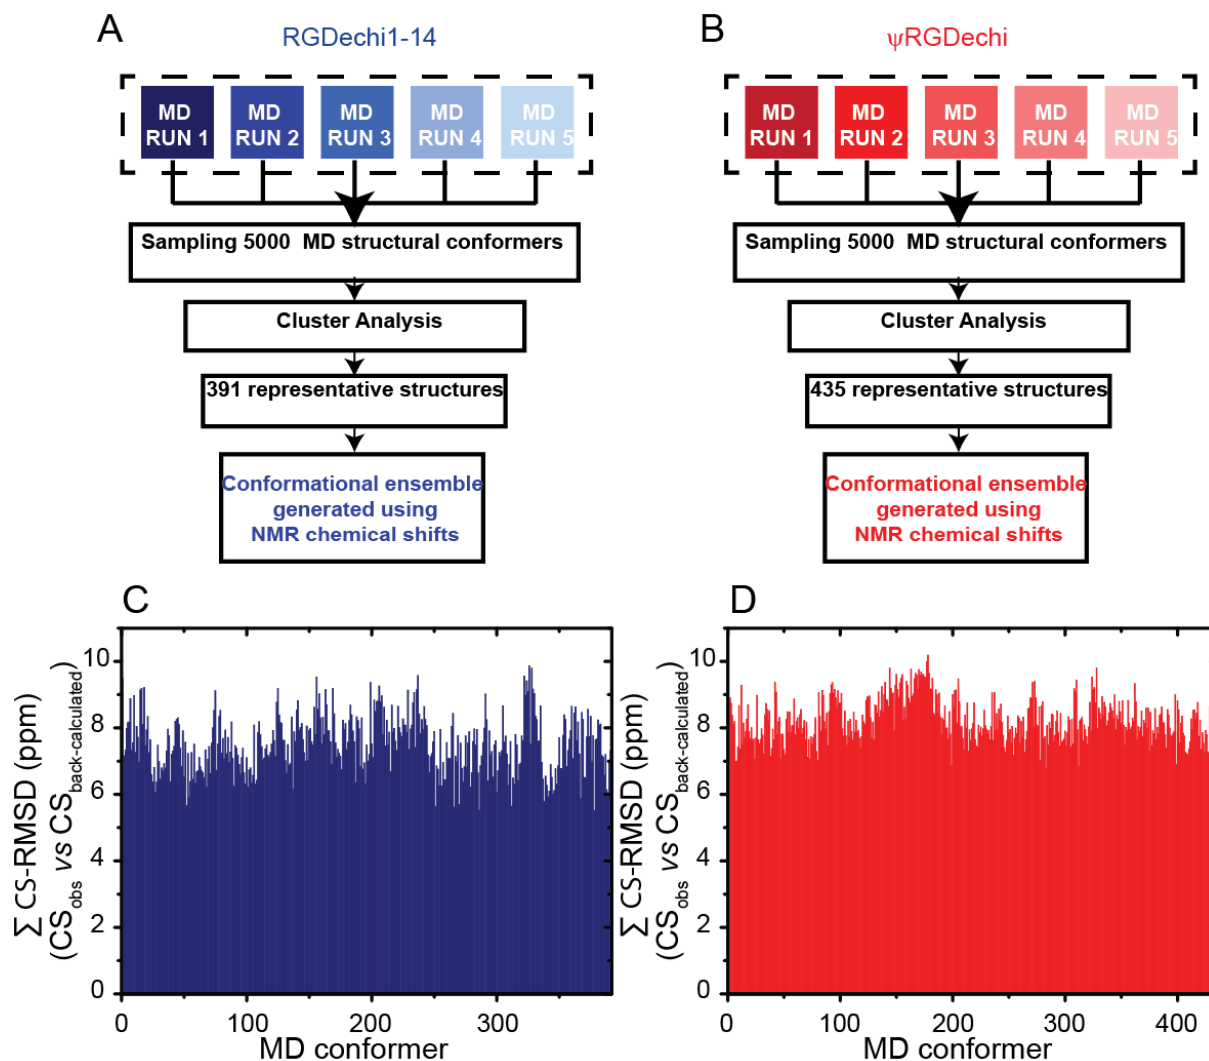

**Figure S5.** Evaluation of three MD ensembles generated for RGDechi1-14 and  $\psi$ RGDechi using the experimental  $^1\text{H}$ ,  $^{15}\text{N}$  and  $^{13}\text{C}$  chemical shifts. The MD ensemble 50x was generated selecting the 50 conformers with the lowest global CS-RMSD; the MD ensemble2 50x was obtained including the 50 conformers with the highest global CS-RMSD; the MD ensemble3 50x was created considering 50 randomly selected conformers. The yellow and blue dash lines indicate the lowest global CS-RMSD values obtained by fitting each MD model for RGDechi1-14 and  $\psi$ RGDechi, respectively.

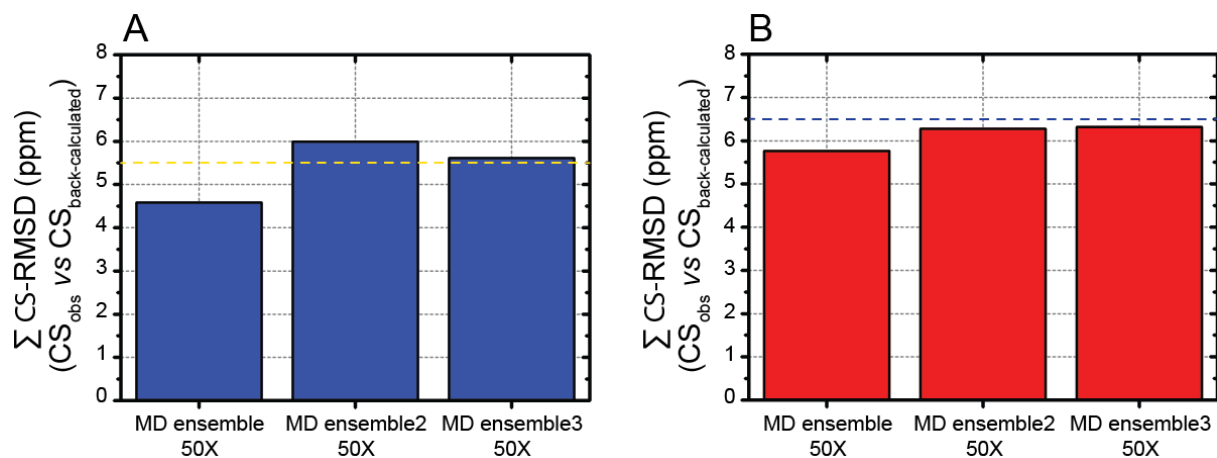



**Figure S6.** Correspondence between experimental and MD ensemble 50X derived  $^3J_{\text{HN,H}\alpha}$  coupling constants for RGDechi1-14 (A) and  $\psi$ RGDechi (B).

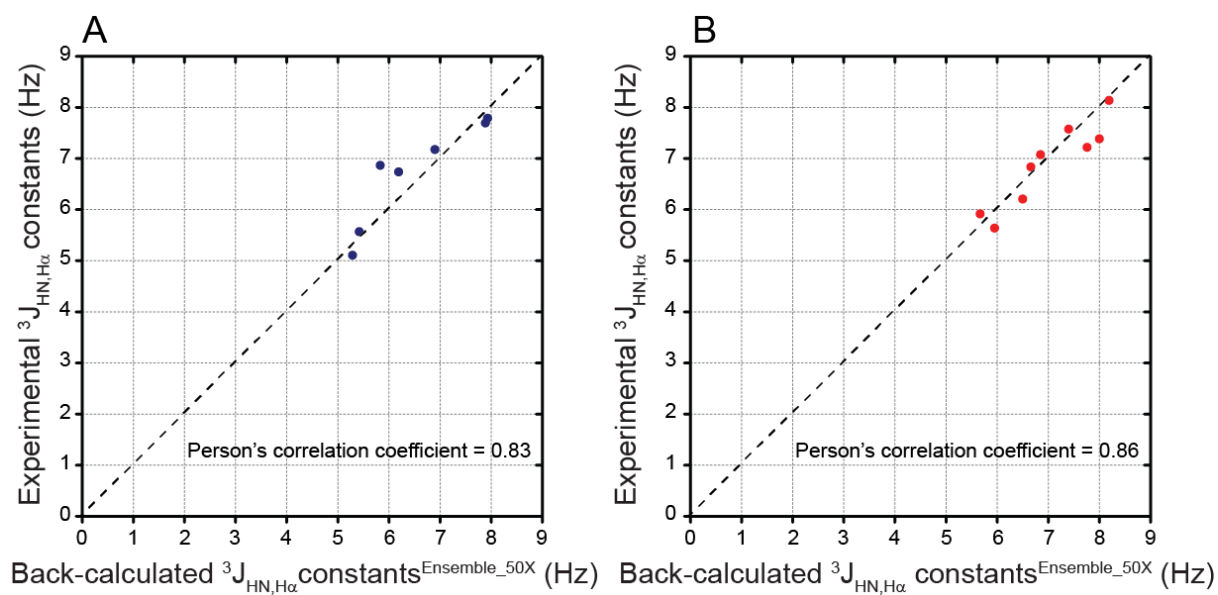

**Figure S7.** Back-calculated versus experimental proton (A),  $C\alpha/C\beta$  (B) and nitrogen (C) chemical shifts. The predicted shifts were obtained, as reported in the material and methods, using the  $\psi$ RGDechi-bound conformation reported by Comegna *et al.*. (D) Cumulative  $^1H$ ,  $^{13}C$  and  $^{15}N$  chemical shift differences between predicted and observed shifts plotted as a function of residue number.

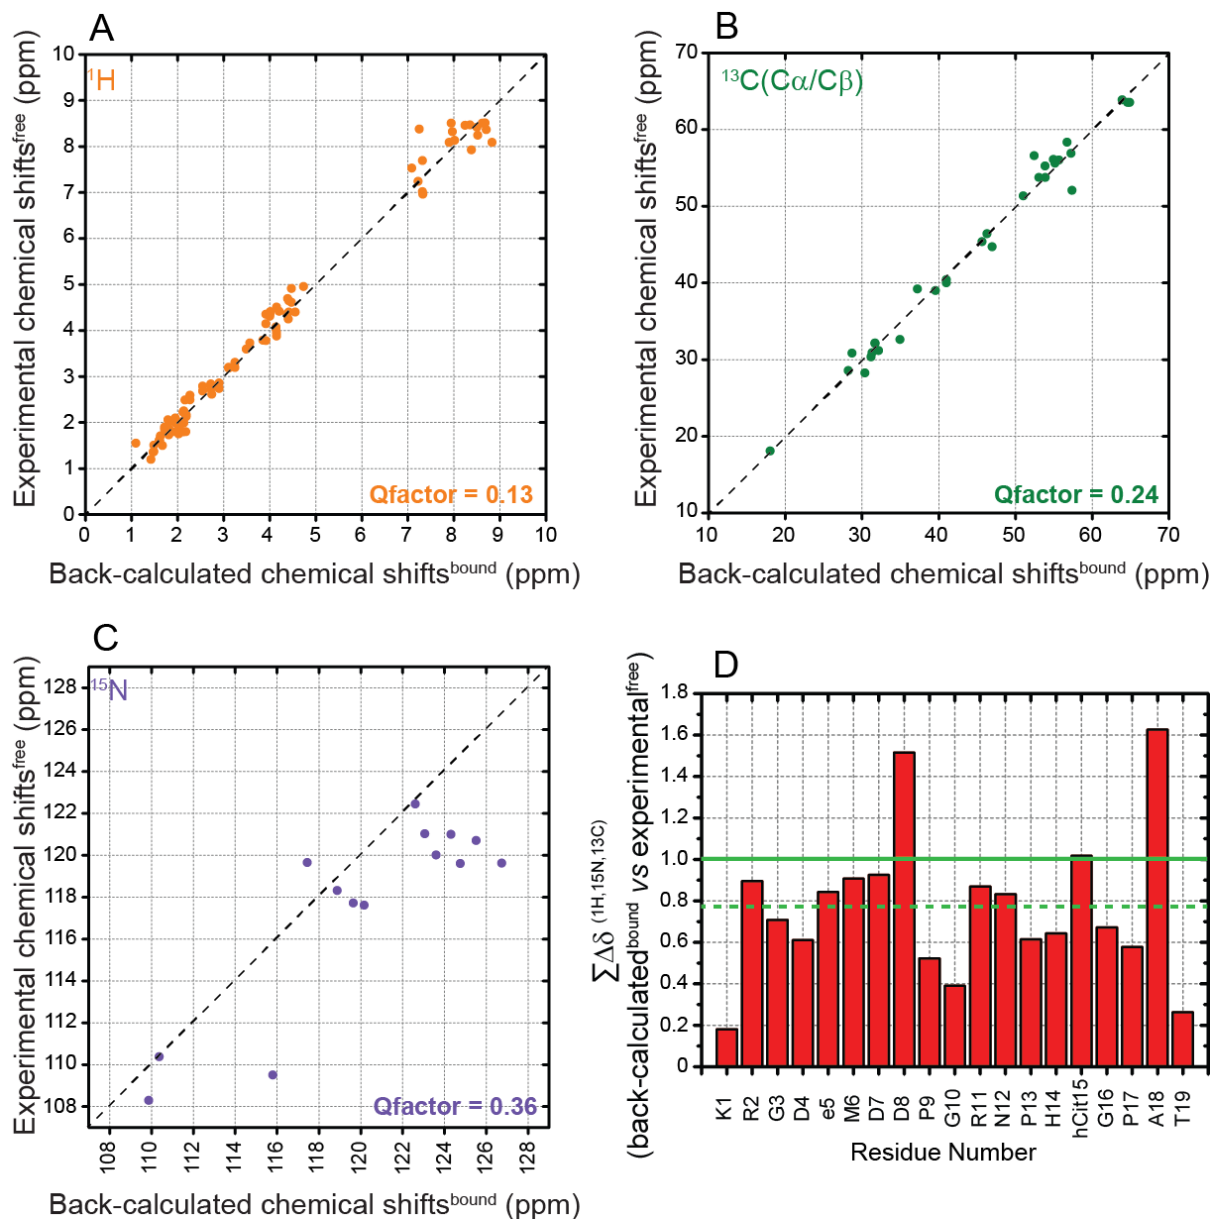

Supplement: s1 [file s1]
